# Supplementary material
Source: Research Square preprint supplement (doi:10.21203/rs.3.rs-9108302/v1)
Supplement: Supplementary file 1 [file 0da6dff09136cc34f3579fb3.docx]

Supplementary Material

for

Wildfire Smoke Leaves Temporally Persistent and Spatially Heterogeneous Economic Impacts on Housing Markets

Shijin Wei1, Yayun Chen2, Sulong Zhou3, Joey Li3, Wenjing Gong3, Jonathan Halket4,5, Chengcheng Fei2, Yangyang Xu1*, Xinyue Ye3,6*

1 Department of Atmospheric Sciences, Texas A&M University, College Station, TX 77843, USA

2Department of Agricultural Economics, Texas A&M University, College Station, TX 77843, USA

3Department of Landscape Architecture and Urban Planning, Texas A&M University, College Station, TX 77843, USA

4Center for Hispanic Housing Studies, Texas A&M University, College Station, TX 77843, USA

5Wharton School of Business, University of Pennsylvania, Philadelphia, PA 19104, USA

6Department of Geography and the Environment, The University of Alabama, Tuscaloosa, AL 35401, USA

# **S1. Literature Review on Wildfire, Smoke, and Real Estate Markets**

The loss of economic activities reflected in insurance, real estate markets, employment rates, and tourism in North America, Europe, Asia, and Australia has been linked to the wildfire events in recent years (Edwards et al., 2020; Meier et al., 2023; Akter et al., 2025; Quiroz & Thomas, 2025).

In addition to the direct fire damage and loss of life and property, wildfires release massive plumes of smoke that can affect communities far from the burning area. The fine particulate matter with an aerodynamic diameter of 2.5 µm or less (PM2.5) is a principal constituent of wildfire smoke, and it can be transported hundreds of miles downwind (Jaffe et al., 2020), as reported from the recent Canadian and California fires (Peterson et al., 2018; Zhang et al., 2025). Indeed, in light of the general decline in anthropogenic sources, wildfires have become a major source of air pollution in the contiguous U.S., accounting for an estimated 25% of total PM2.5 levels (Elkins et al., 2025; Zhang et al., 2023).

Moreover, emerging evidence indicates that wildfire-related PM2.5 may be more toxic than typical ambient PM2.5 (Connolly et al., 2024; Vicente et al., 2025). Wildfire smoke contains higher levels of organic compounds and free radicals, which increase its oxidative potential and its health-related impacts (Wilgus and Merchant, 2024). For example, a study in Southern California found that a 10µg m–3 increase in wildfire PM2.5 was associated with up to a 10% increase in respiratory hospitalizations, compared with only 0.67–1.3% for non-wildfire PM2.5 (Aguilera et al., 2021). When wildfires encroach upon the wildland–urban interface (WUI), combustion of built structures introduces additional toxic constituents. The 2025 Los Angeles fires, in which painted walls, pipes, plastics, and electronics burned, were associated with an approximate 110-fold increase in airborne lead concentrations relative to pre-fire levels (Baliaka et al., 2025). The extreme spike in lead embedded in PM2.5 underscores that structural combustion can exacerbate the toxicity of smoke plumes from urban-forest fires.

Wildfire smoke can also impose a broad and diffuse economic burden beyond the healthcare sector. Among these, housing markets represent a particularly critical and long-lasting mechanism that influences the broader economy, as property prices may internalize both immediate exposure and long-term perceptions of environmental risk. When making major purchases such as a home, buyers and sellers implicitly capitalize local environmental amenities (e.g., clean air, green space, good views) and disamenities (e.g., water pollution, noise, wildfire smoke) into property prices, a relationship that can be formulated through the hedonic pricing model (Rosen, 1974). The hedonic approach treats a housing price as reflecting a suite of attributes, including structural features and environmental characteristics (Kalhor et al., 2018). Many studies have applied this approach to quantify the impacts of environmental factors on housing values. For instance, housing markets have been shown to internalize the costs of flood risk (Bin and Polasky, 2004; Kousky, 2010), water contamination (Davis, 2004; Guignet, 2013), and soil or hazardous waste pollution (Kiel and Zabel, 2001; Greenstone and Gallagher, 2008). These studies demonstrate that environmental degradation, whether due to natural hazards or anthropogenic causes, is capitalized into property prices, reflecting households’ willingness to pay for cleaner, safer living conditions.

Many studies have investigated the real estate implications of wildfire exposure, largely using event-based indicators such as burn perimeters, fire frequency, or distance to fire zones. These studies, grounded in hedonic pricing theory (Rosen, 1974), find that wildfire risks are capitalized into housing markets, often resulting in significant price discounts. For instance, Mueller et al. (2018) observed that, after the Schultz Fire in Arizona in summer 2010, homes within 5 km of the burn perimeter declined in value by roughly 31%. Similarly, Shi et al. (2022) created a fire index for Colorado that combines such event-based metrics into a single term (while still using a dummy variable to represent wildfires). Using this fire index, they found that large wildfires significantly decreased housing prices in wildland-urban interface areas. In contrast, in some interface communities, fires were associated with slight price increases, possibly due to post-fire rebuild and landscape changes.

Despite these insightful contributions, event-based approaches have important limitations. Event-based metrics, such as wildfire occurrence or wildfire dates, may not align well with real-world market activities because housing transactions occur continuously over time (before and after fires). Moreover, these metrics often fail to capture a pervasive dimension of wildfires, that smoke pollution can travel hundreds of kilometers, degrading air quality and influencing human behavior well beyond the burn area and burn period. For instance, Magzamen et al. (2021) found a sharp rise in asthma hospitalizations in Colorado during a 2015 Canadian wildfire event. Ground-based aerosol observations by Creamean et al. (2016) showed that wildfires in the Pacific Northwest substantially elevated PM2.5 concentrations and trace metal levels in Boulder, Colorado. Satellite fire detections and aerosol transport models confirmed the long-range influence of smoke. Similar long-range transport has been documented elsewhere, including Canadian wildfire plumes affecting air quality in the northeastern United States (Dreessen et al., 2016), and western U.S. smoke transported across the Atlantic to Europe (Peterson et al., 2018).

The recognition and quantification of long-range transport of fire smoke have driven a shift toward *exposure*-based models that rely on high-resolution pollution data, such as smoke PM2.5 concentrations derived from satellite observations. Recent studies leveraging these data indicate that wildfire smoke exposure can reduce real estate values. For example, Huang and Skidmore (2023) found that PM2.5 from wildfires, including distant fires, caused significant reductions in housing prices, especially for homes located downwind, reinforcing that the negative economic impacts of fire smoke pollution extend well beyond burn perimeters. However, they used county-level monthly total PM2.5 concentrations as the smoke indicator (with wildfire as a separate instrument variable), whereas our research uses 10 km daily satellite-derived smoke concentrations.

These emerging insights that even short-lived fire events can decrease property values raise pressing questions about how homeowners and buyers perceive air pollution risks and how those perceptions continue to affect purchasing decisions as wildfires become more frequent in the years ahead. These results underscore that fire smoke is not only a public health hazard but also affects economic behavior and valuation, even when the fire itself is not a visible or immediate threat to the community.

# **S2. Methodological Details**

## S2.1 Hedonic Price Regression Model

The hedonic price regression model, first formalized by Harrison and Rubinfeld (1978), provides the analytical foundation for the study. The core premise is that a heterogeneous good, such as a dwelling, derives its value not only from its structure but also from the bundle of utility-bearing characteristics it embodies (Chay and Greenstone, 2005). These characteristics span multiple dimensions. Structural attributes include physical and design features such as living area, lot size, building age, number of bedrooms and bathrooms, architectural style, and renovation status. Locational attributes encompass neighborhood and accessibility factors, such as proximity to employment centers, quality of local schools, crime rates, public service provision, transportation infrastructure, and nearby amenities such as parks, retail, and recreation facilities. Environmental attributes can include the natural and built environmental conditions that affect quality of life, such as air quality, noise, and landscape views (Bishop et al., 2020; Anselin and Le Gallo, 2006).

Within this framework, the market price of a property reflects the composite of implicit prices that buyers and sellers assign to these diverse characteristics. While the full hedonic function encompasses a broad set of factors, as described above, our study's empirical analysis focuses on identifying the time-lag effects of wildfire smoke exposure on housing transactions (i.e., closing prices), controlling for a rich set of structural and locational characteristics.By constructing a regression model with the property's price as the dependent variable and other characteristics as independent variables, it is possible to statistically estimate the marginal contribution of each characteristic, including environmental factors, to the price.

The causal pathway of the study can be conceptualized as follows: an increase in wildfire smoke PM2.5 concentrations shifts housing demand away from smokier areas toward areas with lower wildfire pollution (possibly with a time lag), assuming all other factors remain equal. The demand shift results in a price discount for properties in more smoke-prone locations, a phenomenon known as *capitalization*. The model provides estimates of the association between closing prices and the explanatory variables, including wildfire smoke exposure metrics.

In a model that is similar to the main model, we do not include spatial or temporal fixed effects and therefore do not control for unobserved heterogeneity across all the 10-km grid cells (e.g., persistent neighborhood characteristics) or across time (e.g., state-level economic shifts). The simplified model is described below:

Equation (S1)

where it is identified in Equation (1), except for dropping the terms of fixed-effects control.

## S2.2 Model Evaluation

The selection of an optimal specification among configurations and varying sets of explanatory variables was guided by (i) information-theoretic criteria such as Akaike Information Criterion (AIC) and Bayesian Information Criterion (BIC) (Akaike, 1974; Schwarz, 1978), (ii) theoretical consistency with established housing market and environmental-economics principles (Greene, 2018; Wooldridge, 2020), and (iii) the principle of parsimony, favoring simpler models that achieve comparable explanatory performance (Burnham & Anderson, 2002).

Our primary goal is inferential: to understand and quantify the relationship between wildfire smoke exposure metrics and housing prices, so that we can estimate coefficients accurately, rather than to achieve the highest predictive accuracy for the prices themselves. Therefore, AIC and BIC are used as primary metrics (Vrieze, 2012) to compare models with different sets of regressors. Both criteria balance fit against model complexity, with lower values indicating a more preferred model; BIC tends to penalize model complexity more heavily than AIC (Vrieze, 2012). These metrics are suitable for inferential tasks, selecting models that are more likely to generalize well by capturing underlying relationships.

While information criteria such as AIC and BIC guide the overall model selection by balancing goodness-of-fit and parsimony, statistical significance tests (p-values) evaluate whether specific coefficients differ significantly from zero. The statistical significance test provides evidence on the reliability and importance of individual predictors within the preferred specification.

R2 provides some information about overall fit, but maximizing R2 is not the same as obtaining unbiased or consistent estimates for coefficients of interest. A high R2 does not guarantee causal validity, and a model with a modest R2 can still yield statistically reliable and theoretically meaningful coefficient estimates. Similarly, low prediction errors (e.g., Mean Absolute Error (MAE) or Root Mean Squared Error (RMSE) may indicate that the model captures average patterns well, yet the key parameters could remain biased if important confounders are omitted or if the model overfits irrelevant noise. For example, suppose a model predicting house closing prices ignores a variable capturing neighborhood quality but includes smoke exposure and several structural features. Because neighborhood quality is correlated with both smoke and housing prices, omitted variable bias affects the estimated coefficient on smoke. The model might still achieve a low RMSE, accurately predicting prices on average, but it would systematically misattribute part of the neighborhood effect to smoke exposure, leading to biased inference even with good predictive performance, which underscores why predictive accuracy alone is insufficient for making meaningful causal interpretation. Therefore, AIC and BIC are more appropriate for selecting model specifications in this inferential context. These criteria explicitly penalize model complexity, helping to avoid overfitting that can occur when solely maximizing R2 and minimizing MAE or RMSE. By balancing the fit and parsimony, these information criteria support more generalizable and interpretable insights into the underlying economic relationships between wildfire smoke and housing markets.

In summary, we deliberately focus on inferential statistics (coefficients, AIC, BIC, and p-values) rather than purely predictive error metrics such as MAE, RMSE, or R2. Again, our primary goal is to estimate the causal or associative effect of wildfire smoke exposure on house closing prices after controlling for covariates, such as structural and locational covariates, which is an *inferential* task centered on parameter estimation and hypothesis testing, rather than a predictive task.

**S2.3 Imputation of Missing Smoke Values in Wintertime**

First, a rule-based method was applied to avoid falsely attributing wildfire-related PM2.5 during the periods with limited observational evidence. A value of zero was assigned to the missing data points (daily, 10 km by 10 km) only when a strict set of conditions were met simultaneously: (a) the smoke data was missing from the original dataset, and there were no fire detections from the NOAA HMS observations within the grid, and (b) any non-local fires on the same day were deemed insignificant, being either too distant (> 600 km, out of state) or too small (burned area under 1 km2). This conservative rule ensures that only days and locations with a very high likelihood of being actually smoke-free are imputed as zero, improving the quality of the exposure data used for subsequent regression modeling.

To be specific, the fire-related event features, including the size of the burn area, the number of fire clusters, and the distance between grid points and their nearest cluster, were derived from active fire detection data from NOAA HMS. The raw fire-detection points from HMS have spatial and temporal resolutions that depend on the satellite sources, as HMS combines multi-satellite observations with quality control and analysis. We process the fire points data using a clustering algorithm proposed by Childs et al (2022) to identify significant fire clusters. In addition to the burn area size and the number of fire points on each day that quantify fire intensity for each identified fire cluster, we also follow the methods proposed by Childs et al. (2022) to measure the distance of each 10-km grid box (as shown in Figure 1c and d) from its centroid to the nearest fire cluster.

In addition, for the remaining missing values that are likely to be non-zero, particularly during the winter months (November, December, and January), this study employs a predictive imputation technique using the XGBoostalgorithm.XGBoost is a machine learning method that builds an ensemble of decision trees to make an estimation based on patterns in the available data (Tran et al., 2024). XGBoost excels at capturing complex, nonlinear relationships and includes a built-in, sparsity-aware algorithm to intelligently handle missing data during training (Wei et al., 2025). Specifically, our training dataset for the XGBoost model consists of all grid boxes and days with known smoke values from Childs et al. (2022), including those imputed as zero in the first step above.

Our XGBoost model was trained using the fire-related features mentioned above as estimators for each grid box: the distance to the nearest fire cluster, the number of fire points, and the size of the nearest fire cluster (Figure 2a). The XGBoost model was configured with the following parameters: objective function that minimizes MSE (*n_estimators*=2500, *learning_rate*=0.05, *max_depth*=10, *subsample*=0.8, and *colsample_bytree*=0.8). To prevent overfitting, an *early_stopping_rounds* value of 50 was used. The target smoke concentrations were transformed using ln(1+x) and standardized. The model's robustness and predictive accuracy were rigorously evaluated using 10-fold cross-validation before the final model was trained on all available data to estimate non-zero missing values on winter days. The validation performance includes *R2* = 0.93, *RMSE* = 0.26, and *MAE* = 0.15. With a mean smoke concentration of 1.49 µg m-3, the model’s MAE corresponds to an average relative error of 16.4% (0.15/ln(1+1.49)), while RMSE reflects larger deviations (~28.5%, 0.26/ln(1+1.49)) primarily driven by extreme smoke events. Given the highly skewed nature of smoke distributions and the achieved *R2* of 0.93, these errors of imputing wintertime smokes are acceptable in practical and physical terms.

# **S3. Supplementary Results**

**S3.1 Hedonic Regression Model Results on Housing Structure**

With respect to housing structure effects in model 8, the standard property characteristics in Table S1 indicate that larger living area, lot size, and number of bathrooms are positively associated with closing prices, whereas house age shows a small but statistically significant depreciation effect. However, the statistically significant positive interaction between age and luxury status suggests that high-end properties retain, or even enhance, their value with age, reflecting enduring architectural quality or brand reputation. Furthermore, luxury SFR properties command a smaller premium, indicating that the average closing price for larger SFRs in Colorado is relatively high compared to other properties, as evidenced by negative coefficients on housing-type dummy variables, including condominiums, townhouses, and multifamily units.

**S3.2 Fall 2020 Smoke Impacts on Colorado’s Total Housing Values and Property Tax Revenue**

To quantify the economic burden of wildfire smoke under a realistic exposure scenario, we use the observed difference in average smoke PM2.5 concentrations from the severe Fall 2020 fire season relative to a relatively clean baseline (Winter 2019). Using grid-balanced averages, mean smoke concentrations increased from 1.96 µg m⁻3 in Winter 2019 to 6.61 µg m⁻3 in Fall 2020, corresponding to a net increase of = 4.65 µg m⁻3.

We translate this exposure difference into housing price impacts using the estimated distributed-lag coefficients. Summing coefficients across all lag windows (0–24 months) yields a cumulative semi-elasticity of . Given the log₁₀ specification of housing prices, the implied proportional price change is which corresponds to an approximate 18% reduction in housing prices under the Fall 2020 smoke conditions relative to the baseline. To assess aggregate economic impacts, we scale this percentage change using recent estimates of statewide housing value ($1,333 billion, Zillow 2025) and annual property tax revenue ($15.3 billion, Common Sense Institute 2024), which indicates the loss of 240 billion () and 2.75 billion USD (), respectively. These estimates reflect the cumulative, lagged capitalization of wildfire smoke into housing prices over a two-year horizon based on observed exposure differences.

# **S4. Sensitivity and Robustness Tests on Model Configuration**

## S4.1 Sensitivity to Temporal Lag Structure

To determine an appropriate temporal horizon for wildfire smoke capitalization, we conducted a sensitivity analysis by sequentially extending the distributed lag structure of smoke exposure. This robustness check is to identify the maximum lag length over which smoke effects remain statistically significant. Table S3 summarizes results from a set of progressively specified hedonic models, beginning with short-term exposure and gradually incorporating longer historical windows. Specifically, we estimate models that sequentially add lagged smoke exposure terms from a 0–3 month window (Model 1) through a 21–24 month window (Model 8), and then further extend the lag structure to include a 24–27 month window (Model 9). This stepwise approach allows us to assess the stability of short- and medium-term coefficients as additional historical exposure is introduced, and to identify the point at which further lag inclusion no longer contributes statistically significant information.

The approach allows the observation of the stability of short-term coefficients as long-term history is added. We find that the immediate price penalties (0–3-month and 3–6-month lags) remain stable across all specifications, with coefficients ranging from −0.0013 to −0.0016. The stability indicates that the estimated immediate or short-term impacts are not artifacts of omitted variable bias arising from earlier smoke events. In addition, it identifies the temporal window in which the capitalization effect is maximized. As the lag structure expands, a distinct peak in the magnitude of the negative coefficient emerges in the 12 to 18-month window, which remains the dominant and statistically significant component of the model from Model 5 through Model 8.

When extending the lag window to 24-27 months, three lag terms, including 3-6 months, 6-9 months, and 21-24 months, become statistically insignificant in Model 9, suggesting limited incremental explanatory power from longer historical smoke exposure. Therefore, we selected Model 8 as the primary specification for the main text because it provides the most comprehensive temporal coverage while maximizing model fit.

## S4.2 Validation of Wintertime Smoke Imputation

We employed a machine-learning imputation method to address the systematic loss of satellite smoke observations due to cloud cover and snow reflection during the winter months. The procedure recovered a substantial amount of environmental data that would otherwise be treated as clean air in a standard zero-filled approach (treating missing data simply as zero and pollution-free). A comparison of pollution exposure histories for winter transactions in Table S5 shows that the imputation recovered 43.1% of the pollution mass and increased the average wintertime smoke exposure from 7.82 to 11.19 µg m–3. The increase in observed pollution mass necessitates a robustness check to ensure that the imputed values represent valid environmental signals rather than random noise that could distort model performance.

To test the importance of imputation, we compared the predictive accuracy of the baseline with a zero-filled specification (Model 11), in which missing data were treated as zero. We focused the diagnostic analysis on the subsample of transactions following winter smoke, where imputation is the primary differentiator between the models. The analysis shows that the imputed model achieves a slightly lower Mean Squared Error of 0.009355 than the zero-filled model (0.009356), corresponding to a 0.02% relative improvement in predictive accuracy. Furthermore, the variance decomposition indicates that the imputed smoke variables explain a slightly larger proportion of the residual price variation, with the partial R-squared increasing from 37.75% to 37.76% in the winter subsamples.

These metrics confirm that including imputed wintertime smoke data enhances the model's explanatory power. While the magnitude of the improvement is rather small because structural housing characteristics dominate price determination, the direction of the change is consistent. The reduction in error suggests that the commonly adopted simple zero-fill approach introduces some attenuation bias by underestimating the true extent of smoke exposure. Correcting the bias strengthens the estimated economic penalty, as evidenced by the smoke coefficient at the 15−18 months lag increasing by about 5% from −0.0043 in the zero-filled model to −0.0045 in the imputed model. We therefore rely on the imputed dataset for the main analysis to provide the most accurate assessment of smoke capitalization risks.

## S4.3 Robustness to Dependent Variable Specification

To verify that our findings are not artifacts of property size or structural scale, we scrutinized the sensitivity of our hedonic estimates to the definition of the dependent variable. While our primary analysis (Model 8) utilizes the log-transformed total closing price to capture the gross capitalization of environmental disamenities, we estimated an alternative specification (Model 10) using the log-transformed unit closing price (price per square foot).

Table S7 presents the comparison between these two specifications. The alternative model (Model 10) reproduces the distinct temporal lag structure observed in the baseline results. Specifically, the smoke coefficients remain consistently negative across all lag windows in the unit price model, and the magnitude of the depreciation follows an identical trajectory, peaking at the 15–18-month lag (β = –0.0053), just as it does in the main Model 8 (β = –0.0045). The structural alignment confirms that the delayed penalty is a robust market phenomenon, not driven by the correlation between house size and location.

However, the diagnostic metrics heavily favor the main specification. Model 8 achieves an adjusted R-squared of 0.805, significantly outperforming Model 10’s 0.527. Furthermore, the AIC and BIC are markedly lower for the total price specification, indicating a superior fit to the data. Consequently, we retained Model 8 for the main analysis, confident that the capitalization signals are stable across price definitions.

# **References**

Aguilera, R., Corringham, T., Gershunov, A., & Benmarhnia, T. (2021). Wildfire smoke impacts respiratory health more than fine particles from other sources: Observational evidence from Southern California. Nature Communications, 12(1), 1493. https://doi.org/10.1038/s41467-021-21708-0

Anselin, L., & Le Gallo, J. (2006). “Interpolation of air quality measures in hedonic house price models: Spatial aspects.” Spatial Economic Analysis, 1(1), 31–52.

Baliaka HD, Ward RX, Bahreini R, et al. Notes from the Field: Elevated Atmospheric Lead Levels During the Los Angeles Urban Fires — California, January 2025. MMWR Morb Mortal Wkly Rep 2025;74:69–71. DOI: http://dx.doi.org/10.15585/mmwr.mm7405a4

Bin, O., & Polasky, S. (2004). Effects of Flood Hazards on Property Values: Evidence Before and After Hurricane Floyd. Land Economics, 80(4), 490-500.

Bishop, K. C., Kuminoff, N. V., Banzhaf, H. S., Boyle, K. J., Von Gravenitz, K., Pope, J. C., ... & Timmins, C. D. (2020). Best practices for using hedonic property value models to measure willingness to pay for environmental quality. Review of Environmental Economics and Policy.

Chay, K. Y., & Greenstone, M. (2005). Does Air Quality Matter? Evidence from the Housing Market. Journal of Political Economy, 113(2), 376-424.

Childs, M. L., Li, J., Wen, J., Heft-Neal, S., Driscoll, A., Wang, S., ... & Burke, M. (2022). Daily local-level estimates of ambient wildfire smoke PM2.5 for the contiguous US. Environmental Science & Technology, 56(19), 13607-13621.

*Common Sense Institute.* Growth in property tax revenue*. Common Sense Institute Colorado (2024). Available at:* [*https://www.commonsenseinstituteus.org/colorado/research/taxes-and-fees/growth-in-property-tax-revenue*](https://www.commonsenseinstituteus.org/colorado/research/taxes-and-fees/growth-in-property-tax-revenue) *(Accessed: 20 February 2026).*

Connolly, R., Marlier, M. E., Garcia-Gonzales, D. A., Wilkins, J., Su, J., Bekker, C., Jung, J., Bonilla, E., Burnett, R. T., Zhu, Y., & Jerrett, M. (2024). Mortality attributable to PM2.5 from wildland fires in California from 2008 to 2018. Science Advances, 10(23), eadl1252. https://doi.org/10.1126/sciadv.adl1252

Creamean, J. M., et al. (2016). Wildfire impacts on atmospheric aerosol composition in the Colorado Front Range during summer 2014. Atmospheric Chemistry and Physics, 16(15), 10031–10048.

Davis, L. W. (2004). The effect of health risk on housing values: Evidence from a cancer cluster. American Economic Review, 94(5), 1693–1704.

Dreessen, J., Sullivan, J., & Delgado, R. (2016). Observations and impacts of transported Canadian wildfire smoke on ozone and aerosol air quality in the Maryland region on June 9–12, 2015. Journal of the Air & Waste Management Association, 66(9), 842-862.

Elkins, S., Fiore, A. M., Correa, G. P., Lamarque, J. F., Smith, S. J., Naik, V., & Xu, Y. (2025). Detecting tropospheric composition and climate responses to US air pollution controls in the context of internally-arising variability. npj Clean Air, 1(1), 17.

Greenstone, M., & Gallagher, J. (2008). Does hazardous waste matter? Evidence from the housing market and the Superfund program. Quarterly Journal of Economics, 123(3), 951–1003.

Guignet, D. (2013). What do property values really tell us? A hedonic study of underground storage tanks. Land Economics, 89(2), 211–226.

Harrison, D., & Rubinfeld, D. L. (1978). “Hedonic housing prices and the demand for clean air.” Journal of Environmental Economics and Management, 5(1), 81–102.

Huang, Z., & Skidmore, M. (2024). The Impact of Wildfires and Wildfire-Induced Air Pollution on House Prices in the United States. Land Economics, 100(1), 22–50. https://doi.org/10.3368/le.100.1.102322-0093R

Jaffe, D. A., O’Neill, S. M., Larkin, N. K., Holder, A. L., Peterson, D. L., Halofsky, J. E., & Rappold, A. G. (2020). Wildfire and prescribed burning impacts on air quality in the United States. Journal of the Air & Waste Management Association, 70(6), 583-615.

Kiel, K. A., & Zabel, J. E. (2001). Estimating the economic benefits of cleaning up Superfund sites: The case of Woburn, Massachusetts. Journal of Real Estate Finance and Economics, 22(2–3), 163–184.

Kousky, C. (2010). Learning from extreme events: Risk perceptions after the flood. Land Economics, 86(3), 395–422.

Magzamen, S., Gan, R. W., Liu, J., O’Dell, K., Ford, B., Berg, K., Bol, K., Wilson, A., Fischer, E. V., & Pierce, J. R. (2021). Differential Cardiopulmonary Health Impacts of Local and Long-Range Transport of Wildfire Smoke. GeoHealth, 5(3), e2020GH000330. https://doi.org/10.1029/2020GH000330

Mueller, J. M., Lima, R. E., Springer, A. E., & Schiefer, E. (2018). Using matching methods to estimate impacts of wildfire and postwildfire flooding on house prices. Water Resources Research, 54(9), 6189-6201.

Peterson, D. A., et al. (2018). Wildfire-driven thunderstorms cause a volcano-like stratospheric injection of smoke. Proceedings of the National Academy of Sciences, 115(13), E3351–E3359.

Shi, L., Chen, B., Chen, X., & Chen, Z. (2022). Assessing the impact of wildfires on property values in wildland-urban intermix and interface in Colorado: A hedonic approach. Journal of Environmental Management, 319, 115672. https://doi.org/10.1016/j.jenvman.2022.115672

Vicente, E. D., Figueiredo, D., Gonçalves, C., Kováts, N., Hubai, K., Sainnokhoi, T.-A., Vicente, A., Oliveira, H., Lopes, I., & Alves, C. (2025). Toxicological screening of PM2.5 from wildfires involving different biomass fuels. Environmental Pollution, 370, 125887. https://doi.org/10.1016/j.envpol.2025.125887

Wei, S., Shores, K., & Xu, Y. (2025). A Comparison of Machine Learning-Based Approaches in Estimating Surface PM2.5 Concentrations Focusing on Artificial Neural Networks and High Pollution Events. Atmosphere, 16(1), 48. https://doi.org/10.3390/atmos16010048

Wilgus, M.-L., & Merchant, M. (2024). Clearing the Air: Understanding the Impact of Wildfire Smoke on Asthma and COPD. Healthcare, 12(3), 307. https://doi.org/10.3390/healthcare12030307

Zhang, D., Wang, W., Xi, Y., Bi, J., Hang, Y., Zhu, Q., Pu, Q., Chang, H., & Liu, Y. (2023). Wildland Fires Worsened Population Exposure to PM2.5 Pollution in the Contiguous United States. Environmental Science & Technology, 57(48), 19990–19998. https://doi.org/10.1021/acs.est.3c05143

Zhang, Q., Wang, Y., Xiao, Q., Geng, G., Davis, S. J., Liu, X., ... & He, K. (2025). Long-range PM2. 5 pollution and health impacts from the 2023 Canadian wildfires. Nature, 645(8081), 672-678.

Zillow. U.S. housing market reaches record $55.1 trillion. Zillow MediaRoom (2025). Available at: <https://zillow.mediaroom.com/2025-09-08-US-housing-market-reaches-record-55-1-trillion> (Accessed: 20 February 2026).

# **Supplement Tables and Figures**

## Table S1. Housing structure effects on housing closing prices. The variable descriptions are provided in Table S2.

| la_sqft_log10 | 0.502***  (0.003) |
| --- | --- |
| lot_size_log10 | 0.017***  (0.000) |
| total_baths | 0.024***  (0.000) |
| house_age | -0.0005***  (0.000) |
| property_luxury | 0.0086***  (0.001) |
| house_age:property_luxury | 0.0005***  (0.000) |
| property_CONDO | -0.092***  (0.004) |
| property_MULTIFAM | -0.039***  (0.002) |
| property_TWNHSE | -0.065***  (0.004) |
| *Note*: the numbers in the tables represent the coefficients for the corresponding housing structure variable, while the numbers in parentheses are the standard errors, and the asterisk represents the significance level. **p<0.1; **p<0.05; ***p<0.01*. | |

# **Table S2.** Description of main variables

| Variable name | Description | Mean | Std. Dev. | 5th percentile | 95th percentile |
| --- | --- | --- | --- | --- | --- |
| Panel A: Property Price | | | | | |
| price | Closing  Price (2010 USD) | 268,794 | 198,305 | 115,073 | 563,488 |
| Panel B: Property Characteristics | | | | | |
| la_sqft | Living  Area (square feet) | 2,262 | 1,176 | 908 | 4435 |
| house_age | Property Age (years) | 34.09 | 28.52 | 0 | 95 |
| lot_size | Lot Size (acres) | 5.73 | 650.10 | 0.02 | 3.17 |
| total_baths | Number of Bathrooms | 2.81 | 1.14 | 1 | 5 |
| property_SFR | Proportion* of Single-Family Residence  (dummy variable) | 0.84 | - | - | - |
| property_CONDO | Proportion of Condo  (dummy variable) | 0.07 | - | - | - |
| property_MULTIFAM | Proportion of Multifamily  (dummy variable) | 0.06 | - | - | - |
| property_TWNHSE | Proportion of Townhouse  (dummy variable) | 0.02 | - | - | - |
| property_luxury | Proportion of Luxury Houses  (dummy variable) | 0.16 | - | - | - |
| Panel C: Wildfire Smoke Data | | | | | |
| smoke | Smoke PM2.5​ (µg m–3) | 2.37 | 5.12 | 0.00 | 12.02 |
| Panel D: COVID Case Data (2020-2022) | | | | | |
| covid_cases | County-level Daily  New Cases | 38,704 | 51,332 | 0 | 154,505 |
| *The total number of transactions is 238,185. | | | | | |

##

## Table S3. Exploration of the appropriate maximum number of distributed lag terms for smoke exposure. Models are sequentially extended with additional lag windows to evaluate when smoke effects lose statistical significance, rather than to identify an optimal model based on information criteria.

|  | (1) | (2) | (3) | (4) | (5) | (6) | (7) | (8) | (9) |
| --- | --- | --- | --- | --- | --- | --- | --- | --- | --- |
| 0−3M Lag | **−0.0013*****  (0.00023) | −0.0013*******  (0.00023) | −0.0014*******  (0.00025) | −0.0014*******  (0.00025) | −0.0012*******  (0.00025) | −0.0013*******  (0.00025) | −0.0013*******  (0.00026) | −0.0014*******  (0.00027) | −0.0015*******  (0.00032) |
| 3−6M Lag |  | **−0.0017*****  (0.00029) | **−0.0018*****  (0.00029) | **−0.0020*****  (0.00031) | −0.0018*******  (0.00031) | −0.0015*******  (0.00031) | −0.0015*******  (0.00032) | −0.0016*******  (0.00033) | −0.0007*****  (0.00041) |
| 6−9M Lag |  |  | −0.0014*******  (0.00027) | −0.0015*******  (0.00027) | −0.0015*******  (0.00028) | −0.0016*******  (0.00030) | −0.0015*******  (0.00030) | −0.0017*******  (0.00032) | −0.0008*****  (0.00041) |
| 9−12M Lag |  |  |  | −0.0011*******  (0.00026) | −0.0011*******  (0.00027) | −0.0016*******  (0.00030) | −0.0019*******  (0.00031) | −0.0020*******  (0.00032) | −0.0017*******  (0.00041) |
| 12−15M Lag |  |  |  |  | **−0.0020*****  (0.00028) | −0.0023*******  (0.00031) | −0.0028*******  (0.00034) | −0.0031*******  (0.00035) | −0.0031*******  (0.00043) |
| 15−18M Lag |  |  |  |  |  | **−0.0032*****  (0.00038) | **−0.0037*****  (0.00040) | **−0.0045*****  (0.00043) | **−0.0057*****  (0.00051) |
| 18−21M Lag |  |  |  |  |  |  | −0.0021*******  (0.00036) | −0.0024*******  (0.00038) | −0.0015*******  (0.00050) |
| 21−24M Lag |  |  |  |  |  |  |  | −0.0017*******  (0.00040) | 0.0006  (0.00058) |
| 24−27M Lag |  |  |  |  |  |  |  |  | 0.0034*******  (0.00060) |
| Observations | 372,454 | 350,294 | 329,757 | 313,291 | 299,527 | 277,782 | 256,372 | 238,185 | 175,483 |
| Adjusted R−squared | 0.799 | 0.799 | 0.801 | 0.802 | 0.802 | 0.802 | 0.803 | 0.805 | 0.804 |
| *Note*: the numbers in the tables represent the coefficients for the corresponding lag variable, while the numbers in parentheses are the standard errors, and the asterisk represents the significance level. **p<0.1; **p<0.05; ***p<0.01*. | | | | | | | | | |

## Table S4. Comparison of Models with and without the COVID Interactions.

|  | (8) | (12) |
| --- | --- | --- |
| 0−3M Lag | −0.0014*******  (0.00027) | -0.0019*******  (0.00026) |
| 3−6M Lag | −0.0016*******  (0.00033) | -0.0018*******  (0.00031) |
| 6−9M Lag | −0.0017*******  (0.00032) | -0.0021*******  (0.00028) |
| 9−12M Lag | −0.0020*******  (0.00032) | -0.0025*******  (0.00027) |
| 12−15M Lag | −0.0031*******  (0.00035) | -0.0029*******  (0.00028) |
| 15−18M Lag | **−0.0045*****  (0.00043) | **-0.0032*****  (0.00034) |
| 18−21M Lag | −0.0024*******  (0.00038) | -0.0017*******  (0.00029) |
| 21−24M Lag | −0.0017*******  (0.00040) | -0.0014*******  (0.00030) |
| With COVID and Smoke Interactions | Yes | No |
| Observations | 238,185 | |
| Adjusted R-squared | 0.805 | 0.804 |
| Akaike inf. crit. | −446,500 | −446,300 |
| Bayesian inf. crit. | −432,200 | −432,100 |
| *Note*: the numbers in the tables represent the coefficients for the corresponding lag variable, while the numbers in parentheses are the standard errors, and the asterisk represents the significance level. **p<0.1; **p<0.05; ***p<0.01*. | | |

## Table S5. Comparison of Models with and without the Smoke Imputation.

| Merics | (8) | (11) |
| --- | --- | --- |
| Imputation | Yes | No |
| Winter MSE | 0.009355 | 0.009356 |
| Winter Partial R-squared (Smoke) | 37.76% | 37.75% |
| Average Smoke Lag Exposure (ug m-3) | 11.19 | 7.82 |

## Table S6. Comparison of Models with and without the HPI adjustments. The results show that the two models are almost identical except for the adjusted R2. Therefore, the HPI adjustments do not change the smoke effects, but make the housing price more interpretable.

|  | (8) | (13) |
| --- | --- | --- |
| 0−3M Lag | −0.0014*******  (0.00027) | −0.0014*******  (0.00027) |
| 3−6M Lag | −0.0016*******  (0.00033) | −0.0016*******  (0.00033) |
| 6−9M Lag | −0.0017*******  (0.00032) | −0.0017*******  (0.00032) |
| 9−12M Lag | −0.0020*******  (0.00032) | −0.0020*******  (0.00032) |
| 12−15M Lag | −0.0031*******  (0.00035) | −0.0031*******  (0.00035) |
| 15−18M Lag | **−0.0045*****  (0.00043) | **−0.0045*****  (0.00043) |
| 18−21M Lag | −0.0024*******  (0.00038) | −0.0024*******  (0.00038) |
| 21−24M Lag | −0.0017*******  (0.00040) | −0.0017*******  (0.00040) |
| With HPI Adjustments | Yes | No |
| Observations | 238,185 | |
| Adjusted R-squared | 0.805 | 0.817 |
| Akaike inf. crit. | −446,500 | −446,500 |
| Bayesian inf. crit. | −432,200 | −432,200 |
| *Note*: the numbers in the tables represent the coefficients for the corresponding lag variable, while the numbers in parentheses are the standard errors, and the asterisk represents the significance level. **p<0.1; **p<0.05; ***p<0.01*. | | |

## Table S7. Comparison of Model Performance and Smoke Lag Estimates between Total Closing Price and Unit Closing Price Specifications.

|  | (8) | (10) |
| --- | --- | --- |
| 0−3M Lag | −0.0014*******  (0.00027) | -0.0015*******  (0.00031) |
| 3−6M Lag | −0.0016*******  (0.00033) | -0.0012*******  (0.00037) |
| 6−9M Lag | −0.0017*******  (0.00032) | -0.0014*******  (0.00036) |
| 9−12M Lag | −0.0020*******  (0.00032) | -0.0026*******  (0.00037) |
| 12−15M Lag | −0.0031*******  (0.00035) | -0.0036*******  (0.00040) |
| 15−18M Lag | **−0.0045*****  (0.00043) | **-0.0053*****  (0.00050) |
| 18−21M Lag | −0.0024*******  (0.00038) | -0.0028*******  (0.00043) |
| 21−24M Lag | −0.0017*******  (0.00040) | -0.0018*******  (0.00045) |
| Unit Closing Price | No | Yes |
| Observations | 238,185 | |
| Adjusted R-squared | 0.805 | 0.527 |
| Akaike inf. crit. | −446,500 | −378,900 |
| Bayesian inf. crit. | −432,200 | −364,600 |
| *Note*: the numbers in the table represent the coefficients for the corresponding lag variable, while the numbers in parentheses are the standard errors, and the asterisk represents the significance level. **p<0.1; **p<0.05; ***p<0.01*. | | |

##

## Figure S1. (a) Daily number of fire points detected and burned areas smoothed with a 30-day moving average window in Colorado (2018–2022). Grey lines indicate the number of fire detections (left y-axis), while red lines show the burned area (km2; right y-axis). The correlation (r) between two variables is 0.84. (b) Daily smoke PM2.5 concentrations smoothed with a 30-day moving average window in Colorado (2018–2022). The blue line shows the observed smoke, and the orange line shows the imputed daily PM2.5 concentrations during the winter months. Shaded green intervals and vertical labels indicate major wildfire events. (c) Daily closing prices adjusted to 2010 USD and smoothed with a 30-day moving average window for residential sales in Colorado.
